# Supplementary figures and images for: Demographic trends of patients undergoing ophthalmic surgery in Ontario, Canada: a population-based study
Source: HighWire-hosted journal article supplement (doi:10.1136/bmjophth-2023-001253), 2023-05-01

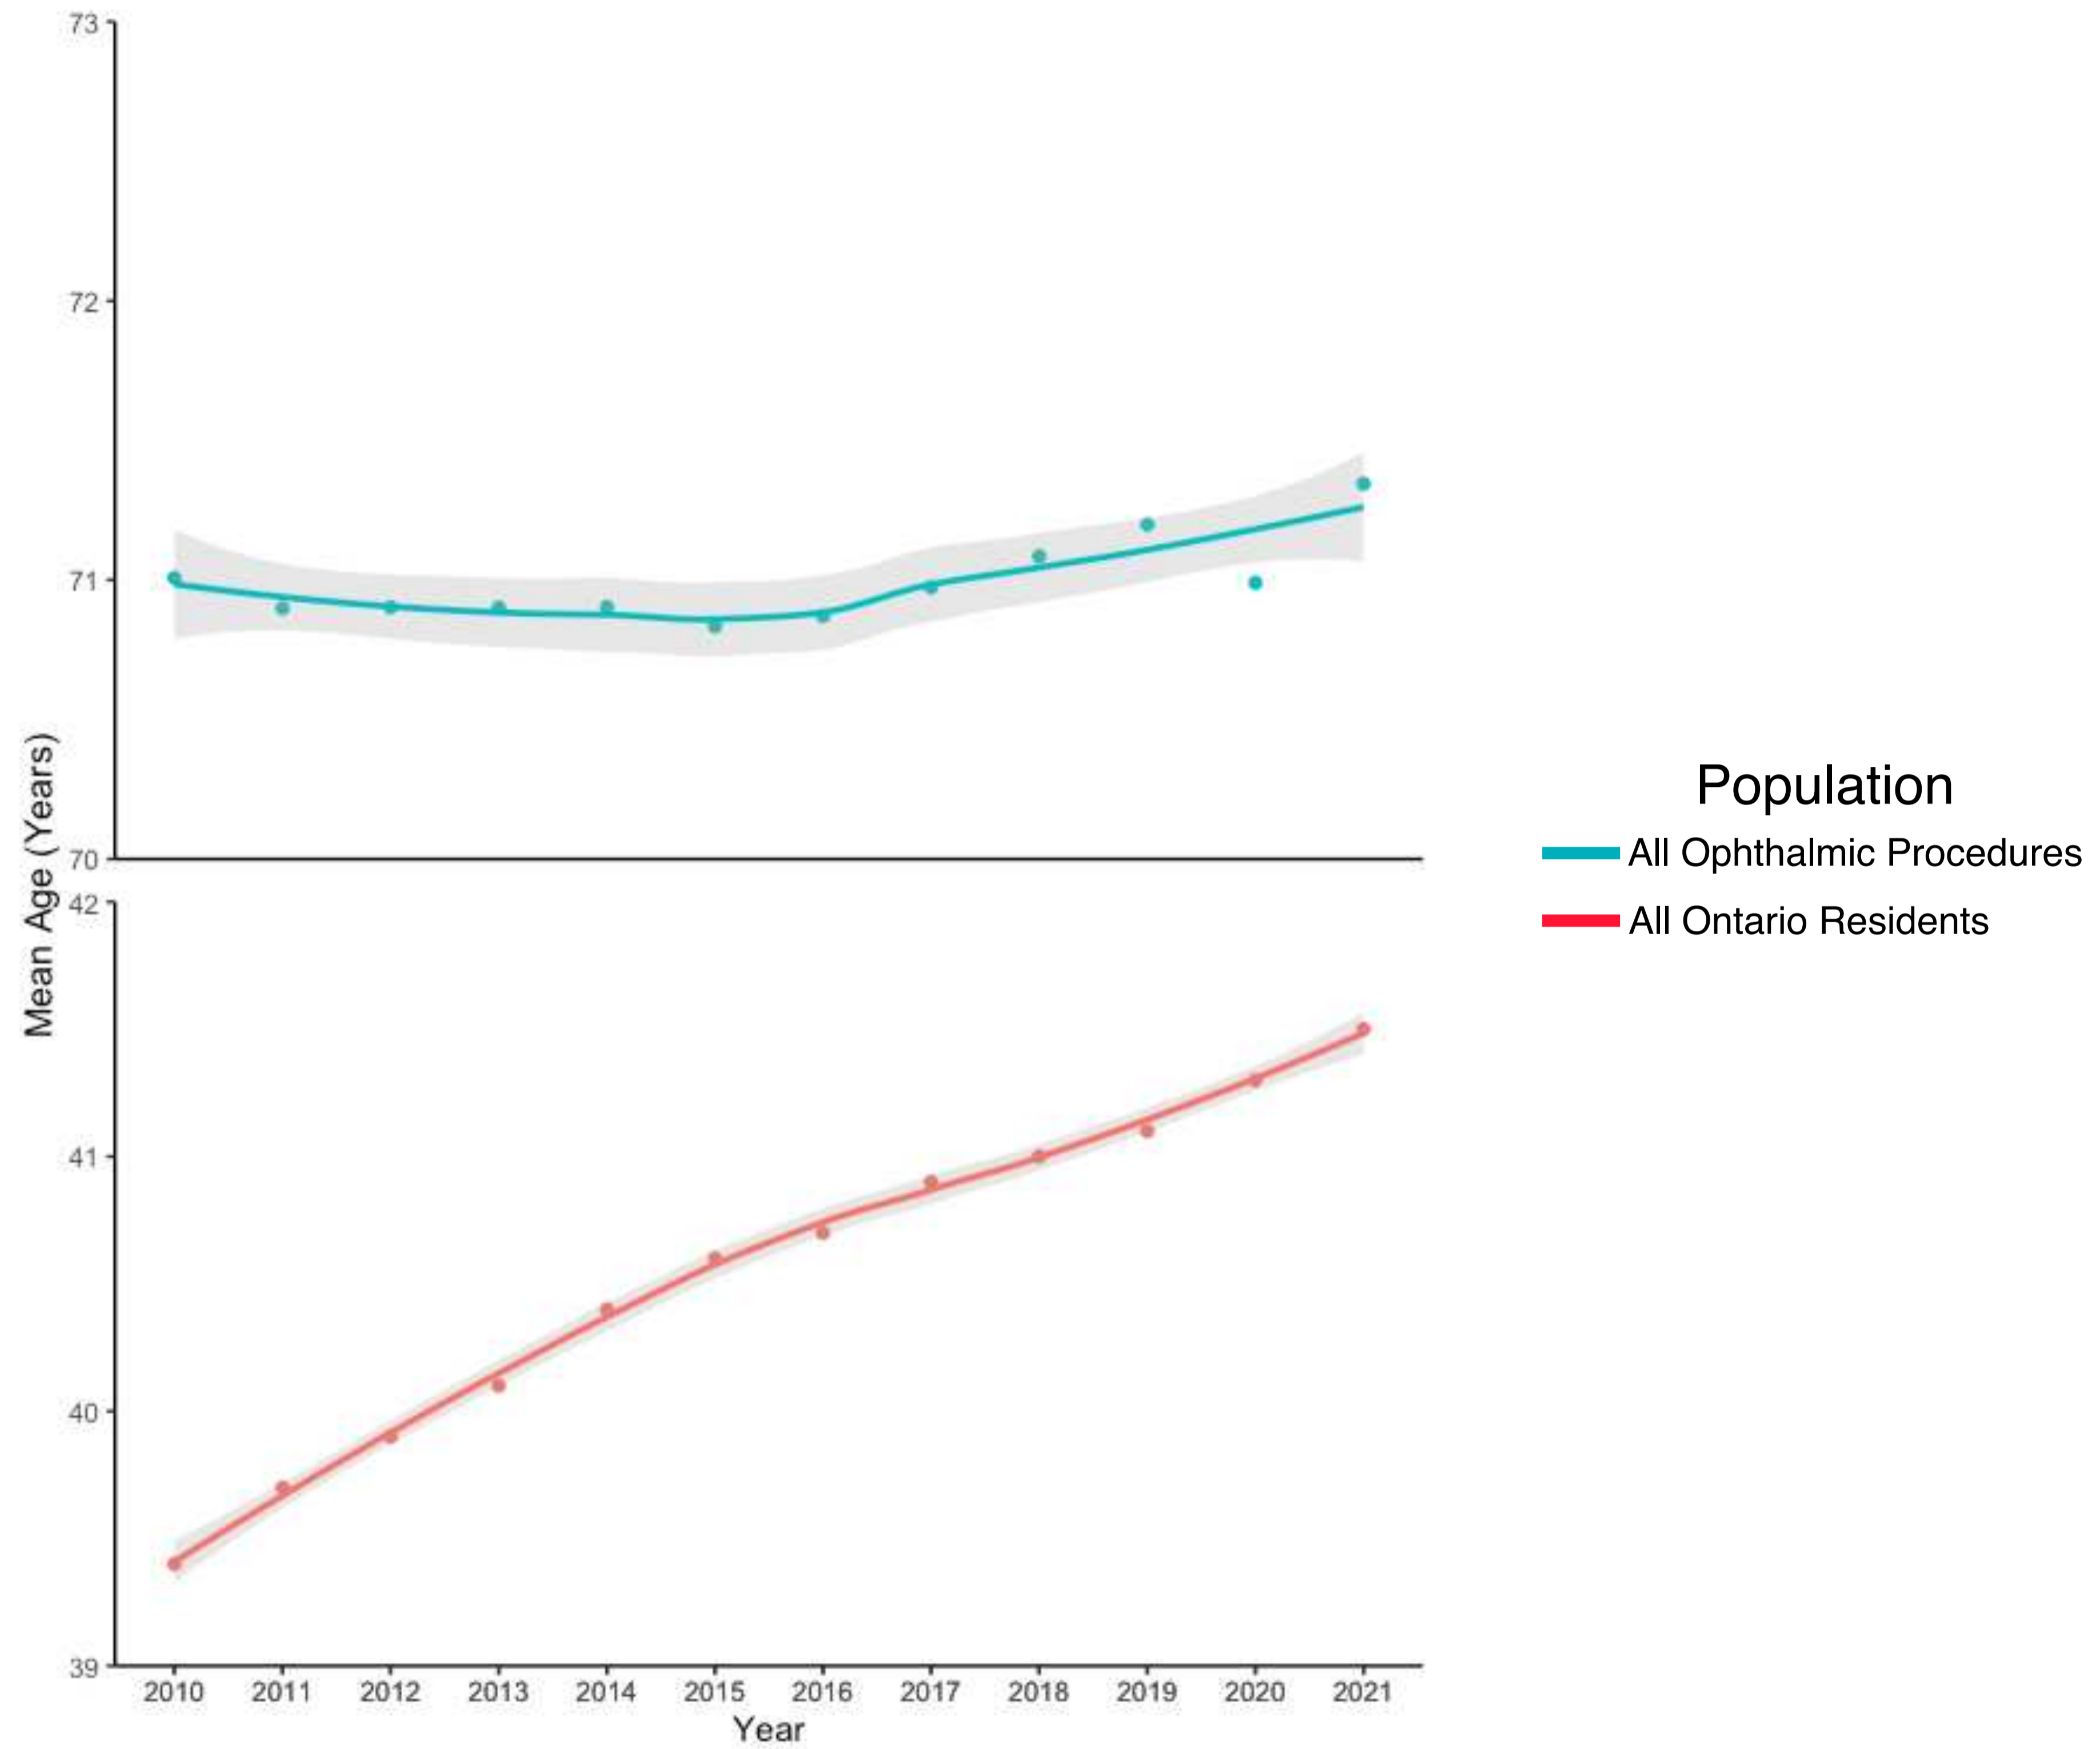

Supplement: bmjophth-2023-001253supp002_data_supplement.pdf [file bmjophth-2023-001253supp002_data_supplement.pdf]
